# Supplementary material
Source: ML conference proceedings conference paper supplement (https://proceedings.neurips.cc/paper_files/paper/2019/hash/cf34645d98a7630e2bcca98b3e29c8f2-Abstract.html)
Supplement: Supplementary file [file cf34645d98a7630e2bcca98b3e29c8f2-Supplemental.zip]

# SELF-ATTENTION WITH FUNCTIONAL TIME REPRESENTATION LEARNING

Da Xu\*, Chuanwei Ruan\*, Sushant Kumar, Evren Korpeoglu, Kannan Achan

Walmart Labs

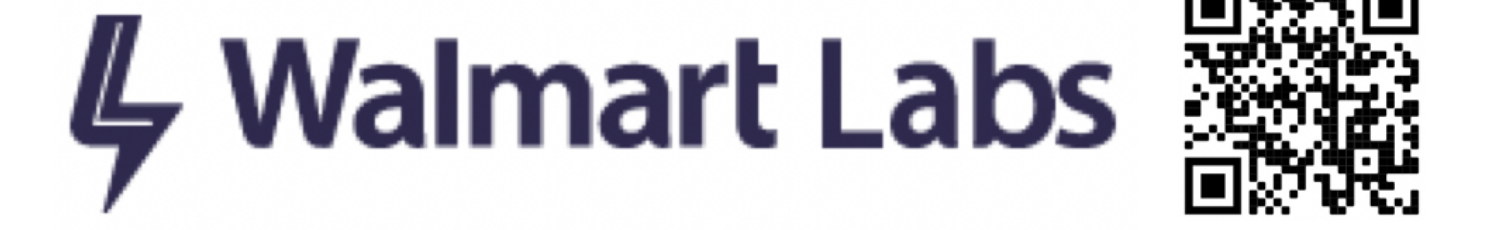

## Self-attention for Continuous-time Sequence Modelling?

- Self-attention mechanism [4] is powerful but only works on discrete-time sequence with positional encoding.
- Time spans between sequential events often carry important signals.
- We identify the forms of functional time mapping that work well with self-attention especially the scaled dot-product attention.
- The proposed approaches have solid theoretical justification and guarantees. Experiments demonstrate its great practical values on real-world continuous-time sequence datasets.

## Preliminaries in Functional Analysis

**Temporal kernel.** Embedding time from an interval  $T = [0, t_{\max}]$  to  $\mathbb{R}^d$  is equivalent to finding a mapping  $\Phi : T \rightarrow \mathbb{R}^d$ . Due to the **inner product** formulation of self-attention [4] and the **translation invariant** property of time spans, we define the *temporal kernel* as  $\mathcal{K} : T \times T \rightarrow \mathbb{R}$  where  $\mathcal{K}(t_1, t_2) := \langle \Phi(t_1), \Phi(t_2) \rangle$  and  $\mathcal{K}(t_1, t_2) = \psi(t_1 - t_2), \forall t_1, t_2 \in T$  for some  $\psi : [-t_{\max}, t_{\max}] \rightarrow \mathbb{R}$ .

**Embedding as feature maps.** The feature map  $\Phi$  captures how the temporal kernel function embeds the original time data into a higher dimensional space. So the task of learning temporal patterns is converted to a kernel learning problem with  $\Phi$  as feature map.

**Theorem 1 (Bochner's Theorem [1]).** A continuous, translation-invariant kernel  $\mathcal{K}(\mathbf{x}, \mathbf{y}) = \psi(\mathbf{x} - \mathbf{y})$  on  $\mathbb{R}^d$  is positive definite if and only if there exists a non-negative measure on  $\mathbb{R}$  such that  $\psi$  is the Fourier transform of the measure.

**Implications:** when scaled properly we can express  $\mathcal{K}$  with:

$$\mathcal{K}(t_1, t_2) = \psi(t_1 - t_2) = \int_{\mathbb{R}} e^{i\omega(t_1 - t_2)} p(\omega) d\omega = E_{\omega} [\xi_{\omega}(t_1) \xi_{\omega}(t_2)^*], \quad (1)$$

where  $\xi_{\omega}(t) = e^{i\omega t}$ . Since the kernel  $\mathcal{K}$  and the probability measure  $p(\omega)$  are real, we extract the real part of (1) and obtain an alternate expression of the kernel:

$$\mathcal{K}(t_1, t_2) = E_{\omega} [\cos(\omega(t_1 - t_2))] = E_{\omega} [\cos(\omega t_1) \cos(\omega t_2) + \sin(\omega t_1) \sin(\omega t_2)]. \quad (2)$$

**Theorem 2 (Mercer Theorem [2]).** Consider the function class  $L^2(\mathcal{X}, \mathbb{P})$  where  $\mathcal{X}$  is compact. Suppose that the kernel function  $\mathcal{K}$  is continuous with positive semidefinite and satisfy the condition  $\int_{\mathcal{X} \times \mathcal{X}} \mathcal{K}^2(x, z) d\mathbb{P}(x) d\mathbb{P}(z) < \infty$ , then there exist a sequence of eigenfunctions  $(\phi_i)_{i=1}^{\infty}$  that form an orthonormal basis of  $L^2(\mathcal{X}, \mathbb{P})$ , and an associated set of non-negative eigenvalues  $(c_i)_{i=1}^{\infty}$  such that

$$\mathcal{K}(x, z) = \sum_{i=1}^{\infty} c_i \phi_i(x) \phi_i(z), \quad (3)$$

where the convergence of the infinite series holds absolutely and uniformly.

**Implications:** we can embed instances from the functional time domain  $T$  into the infinite sequence space  $\ell^2(\mathbb{N})$ , by defining the mapping via  $t \mapsto \Phi^{\mathcal{M}}(t) := [\sqrt{c_1} \phi_1(t), \sqrt{c_2} \phi_2(t), \dots]$ , and Mercer's Theorem guarantees the convergence of  $\langle \Phi^{\mathcal{M}}(t_1), \Phi^{\mathcal{M}}(t_2) \rangle \rightarrow \mathcal{K}(t_1, t_2)$ .

**Note.** We still haven't reached a feasible parametric form for  $\Phi$ , since the  $p(\omega)$  in Bochner's and the set of basis  $\{\phi_i\}$  in Mercer's are unknown.

## Proposed Approaches

**Bochner's encoding.** Following the implications of *Bochner's* Theorem, the expectation in (1) can be approximated by Monte Carlo integral [3]. With  $d$  samples drawn from  $p(\omega)$ , an estimate of our kernel  $\mathcal{K}(t_1, t_2)$  can be constructed by  $\frac{1}{d} \sum_{i=1}^d \cos(\omega_i t_1) \cos(\omega_i t_2) + \sin(\omega_i t_1) \sin(\omega_i t_2)$ . So we propose finite dimensional Bochner feature map:

$$t \mapsto \Phi_d^{\mathcal{B}}(t) := \sqrt{\frac{1}{d}} [\cos(\omega_1 t), \sin(\omega_1 t), \dots, \cos(\omega_d t), \sin(\omega_d t)],$$

and we prove the following claim which guarantees the stochastic uniform convergence.

**Claim 1.** Let  $p(\omega)$  be the corresponding probability measure stated in Bochner's Theorem for kernel function  $\mathcal{K}$ . Suppose the feature map  $\Phi$  is constructed as described above using samples  $\{\omega_i\}_{i=1}^d$ , we have

$$Pr\left(\sup_{t_1, t_2 \in T} |\Phi_d^{\mathcal{B}}(t_1)' \Phi_d^{\mathcal{B}}(t_2) - \mathcal{K}(t_1, t_2)| \geq \epsilon\right) \leq 4\sigma_p \sqrt{\frac{t_{\max}}{\epsilon}} \exp\left(-\frac{d\epsilon^2}{32}\right), \quad (4)$$

where  $\sigma_p^2$  is the second momentum with respect to  $p(\omega)$ .

Therefore, we can either use parametric or non-parametric distributional learning methods to obtain samples from the optimized  $p(\omega)$ , and then construct  $\Phi_d^{\mathcal{B}}$  accordingly.

**Mercer's encoding.** As for the *Mercer* Theorem, we prove in the following Proposition 1 that a straightforward parameterization of the feature map via the Fourier basis expansion is possible, by decomposing the temporal kernel  $\mathcal{K}$  into a set of periodic kernel functions  $\{\mathcal{K}_{\omega}\}$ .

**Proposition 1.** For kernel function  $\mathcal{K}$  that is continuous, PSD and translation-invariant with  $\mathcal{K} = \psi(t_1 - t_2)$ , suppose  $\psi$  is a even periodic function with frequency  $\omega$ , i.e  $\psi(t) = \psi(-t)$  and  $\psi(t + \frac{2k}{\omega}) = \psi(t)$  for all  $t \in [-\frac{1}{\omega}, \frac{1}{\omega}]$  and integers  $k \in \mathbb{Z}$ , the eigenfunctions of  $\mathcal{K}$  are given by the Fourier basis.

After truncating the series of Fourier basis, we have the infinite dimensional Mercer's feature map for each  $\mathcal{K}_{\omega}$ :

$$t \mapsto \Phi_{\omega}^{\mathcal{M}}(t) = [\sqrt{c_1} \cos\left(\frac{j\pi t}{\omega}\right), \sqrt{c_{2j+1}} \sin\left(\frac{j\pi t}{\omega}\right), \dots],$$

where  $c_j$  are the corresponding Fourier coefficients and  $\omega_i$  are free model parameters.

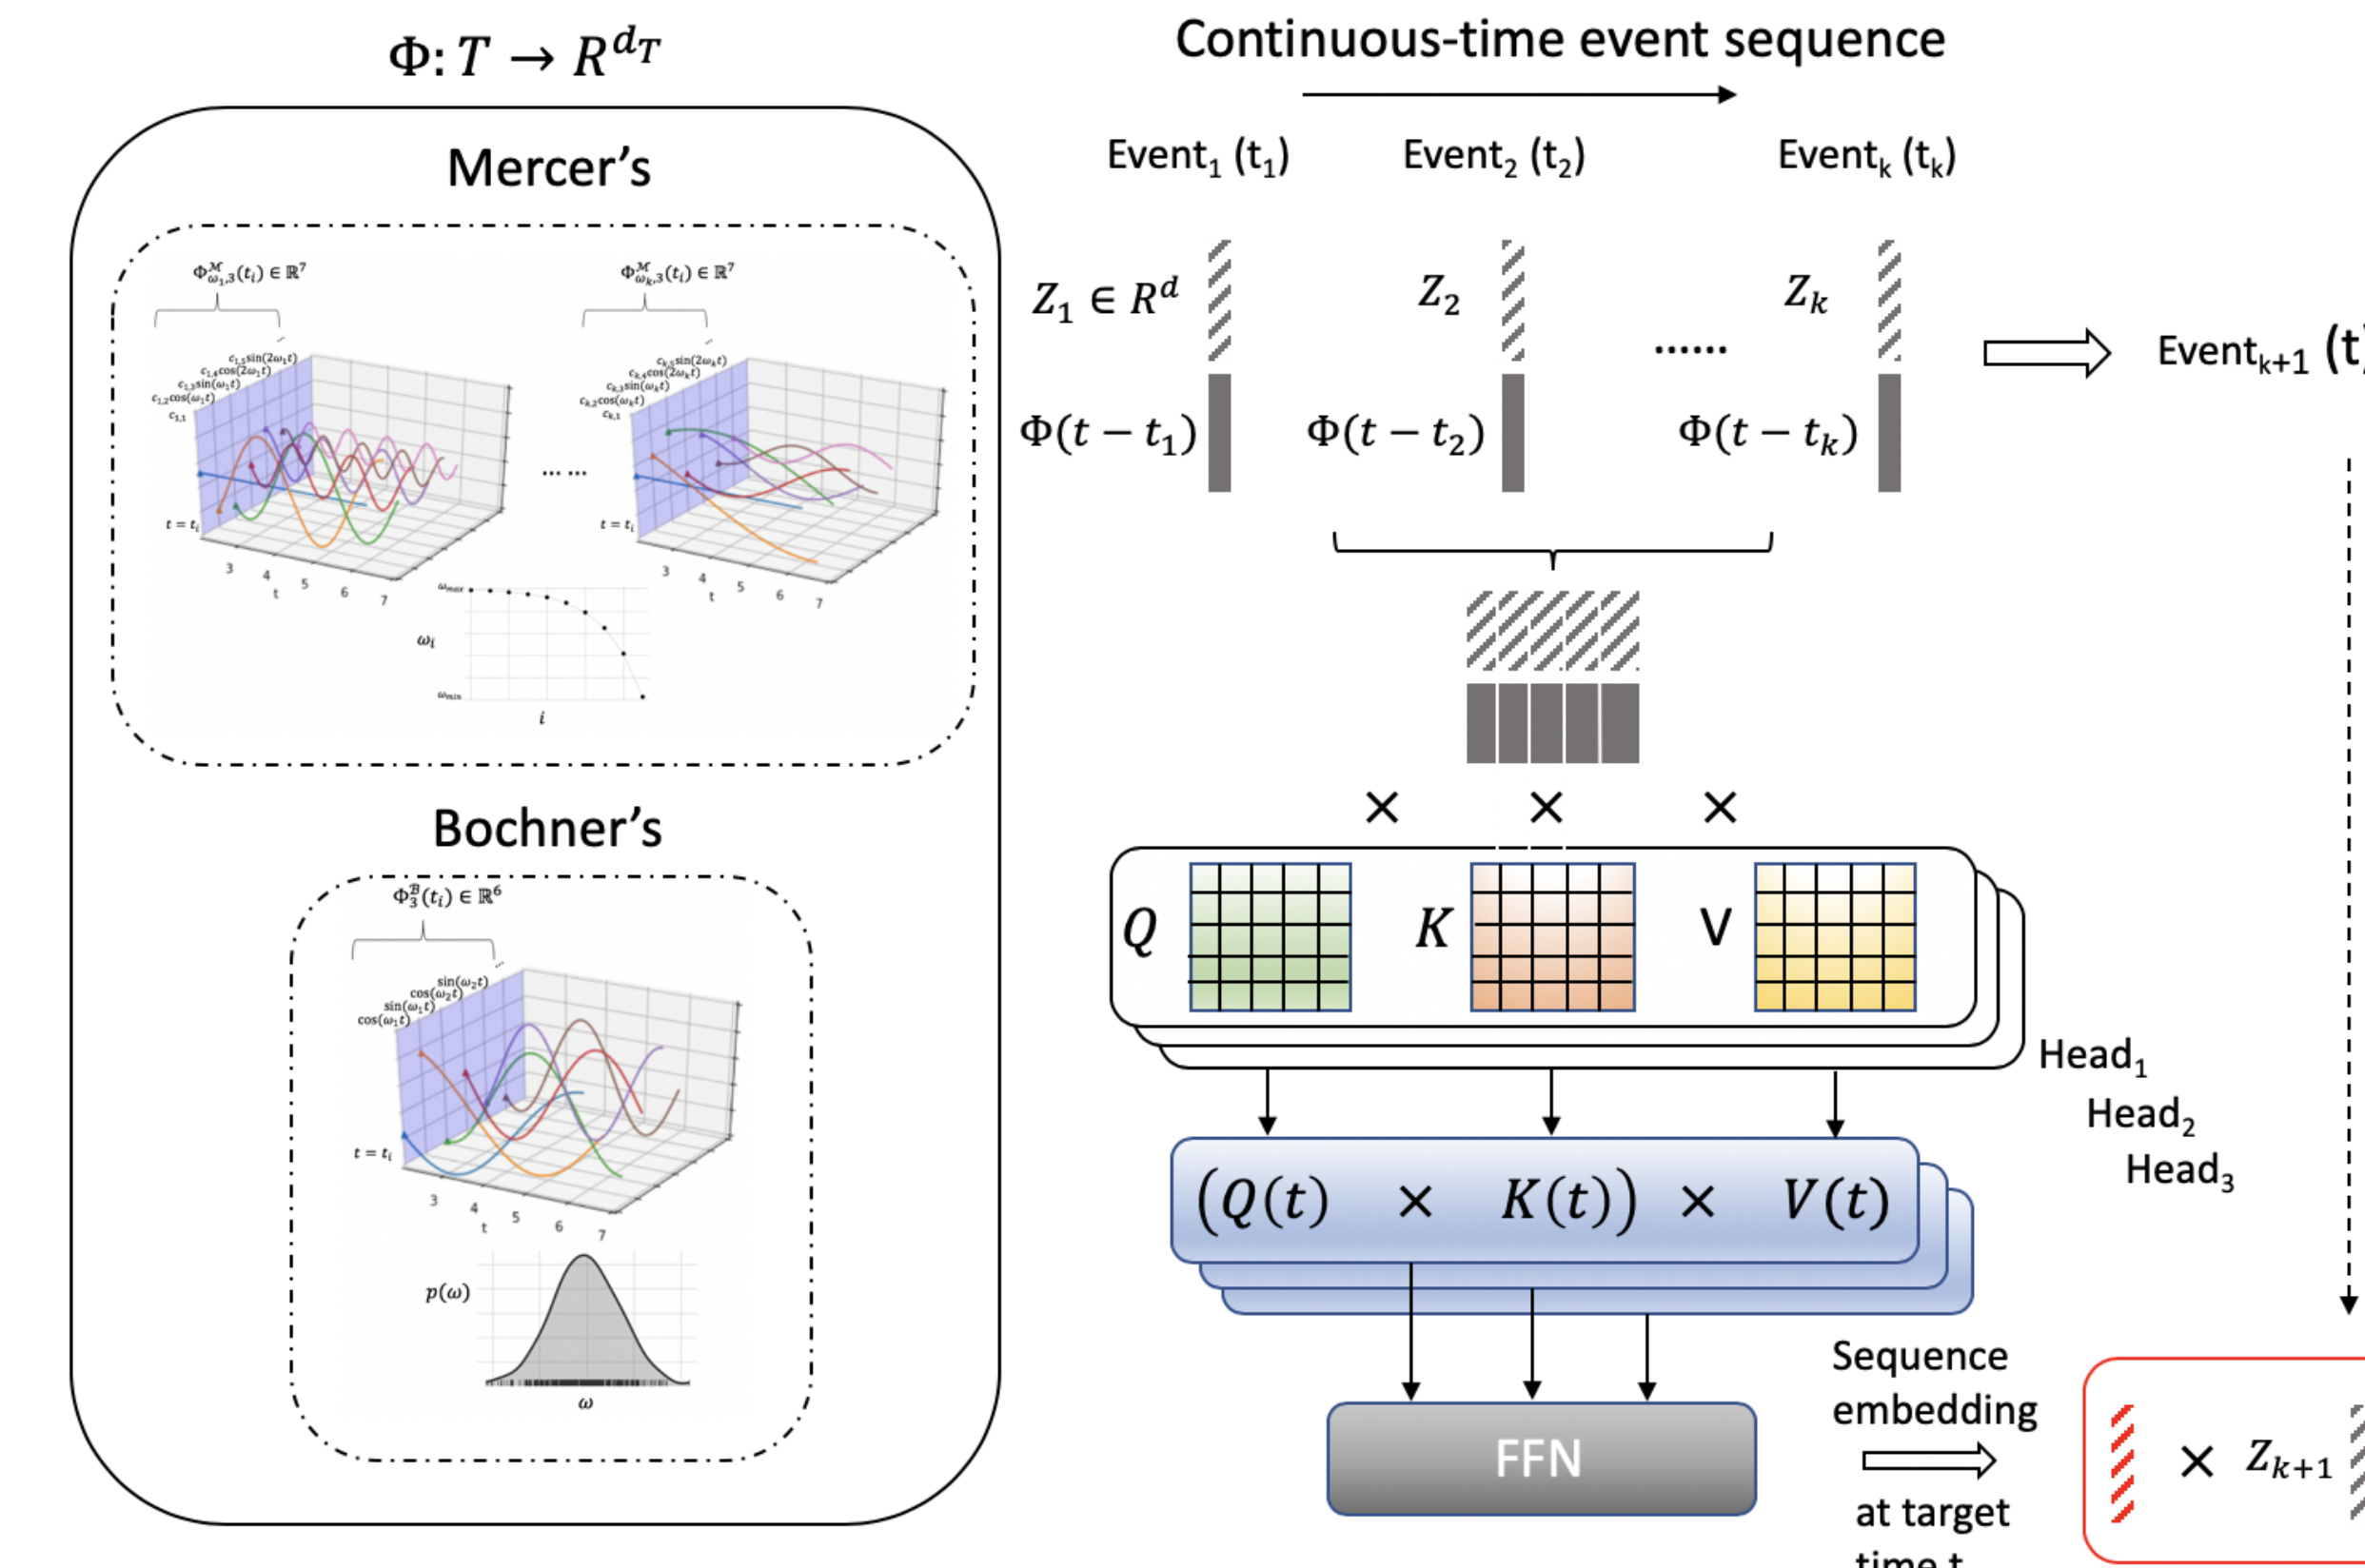

Fig. 1: Left panel: visual illustration of the proposed Bochner and Mercer time embedding ( $\Phi_d^{\mathcal{B}}(t)$  and  $\Phi_{\omega}^{\mathcal{M}}(t)$ ) for a specific  $t = t_i$  with  $d = 3$ . Right panel: network architecture for next-event prediction at time  $t$  with a single block.

## Experiments and Results

**Time-event interaction:** we first concatenate the event embedding and time representations into  $[\mathbf{Z}, \mathbf{Z}_T]$  where  $\mathbf{Z} = [Z_1, \dots, Z_q]$ ,  $\mathbf{Z}_T = [\Phi(t_1), \dots, \Phi(t_q)]$  and then project them into the  $\mathbf{Q}$ ,  $\mathbf{K}$  and  $\mathbf{V}$  spaces respectively to capture their linear or non-linear interactions, e.g.

$$\mathbf{Q} = \text{ReLU}([\mathbf{Z}, \mathbf{Z}_T] \mathbf{W}_0 + b_0) \mathbf{W}_1 + b_1,$$

and finally we use  $\mathbf{h}^{(i)} = \text{Attn}^{(i)}(\mathbf{Q}, \mathbf{K}, \mathbf{V})$  as the hidden output of the  $i^{\text{th}}$  head in the multi-head attention setting.

| Feature maps specified by $[\phi_{2i}(t), \phi_{2i+1}(t)]$               | Origin            | Parameters                                                                                                              | Interpretations of $\omega$                                                                                                                             |
|--------------------------------------------------------------------------|-------------------|-------------------------------------------------------------------------------------------------------------------------|---------------------------------------------------------------------------------------------------------------------------------------------------------|
| $[\cos(\omega_i(\mu)t), \sin(\omega_i(\mu)t)]$                           | Bochner Normal    | $\mu$ : location-scale parameters specified for the <i>reparametrization trick</i> .                                    | $\omega_i(\mu)$ : converts the $i^{\text{th}}$ sample (drawn from auxiliary distribution) to target distribution under location-scale parameter $\mu$ . |
| $[\cos(g_{\theta}(\omega_i)t), \sin(g_{\theta}(\omega_i)t)]$             | Bochner Inv CDF   | $\theta$ : parameters for the inverse CDF $F = g_{\theta}$ .                                                            | $\omega_i$ : the $i^{\text{th}}$ sample drawn from the auxiliary distribution.                                                                          |
| $[\cos(\tilde{\omega}_i t), \sin(\tilde{\omega}_i t)]$                   | Bochner Non-param | $\{\tilde{\omega}_i\}_{i=1}^d$ : transformed samples under non-parametric inverse CDF transformation.                   | $\tilde{\omega}_i$ : the $i^{\text{th}}$ sample of the underlying distribution $p(\omega)$ in Bochner's Theorem.                                        |
| $[\sqrt{c_{2i,k}} \cos(\omega_j t), \sqrt{c_{2i+1,k}} \sin(\omega_j t)]$ | Mercer            | $\{c_{i,k}\}_{i=1}^{2d}$ : the Fourier coefficients of corresponding $\mathcal{K}_{\omega_j}$ , for $j = 1, \dots, k$ . | $\omega_j$ : the frequency for kernel function $\mathcal{K}_{\omega_j}$ (can be parameters).                                                            |

Fig. 2: A summary of the proposed approaches.

We compare among the proposed function mapping methods (the details are shown in Figure 2) in self-attention and with state-of-the-art baseline approaches including self-attention with positional encoding (PosEnc), on recommendation tasks with the **Stack Overflow**, **MoiveLens** and **Walmart.com** datasets. Case studies and analysis on the attention weights are given in Fig. 3. The results are provided in Fig. 4.

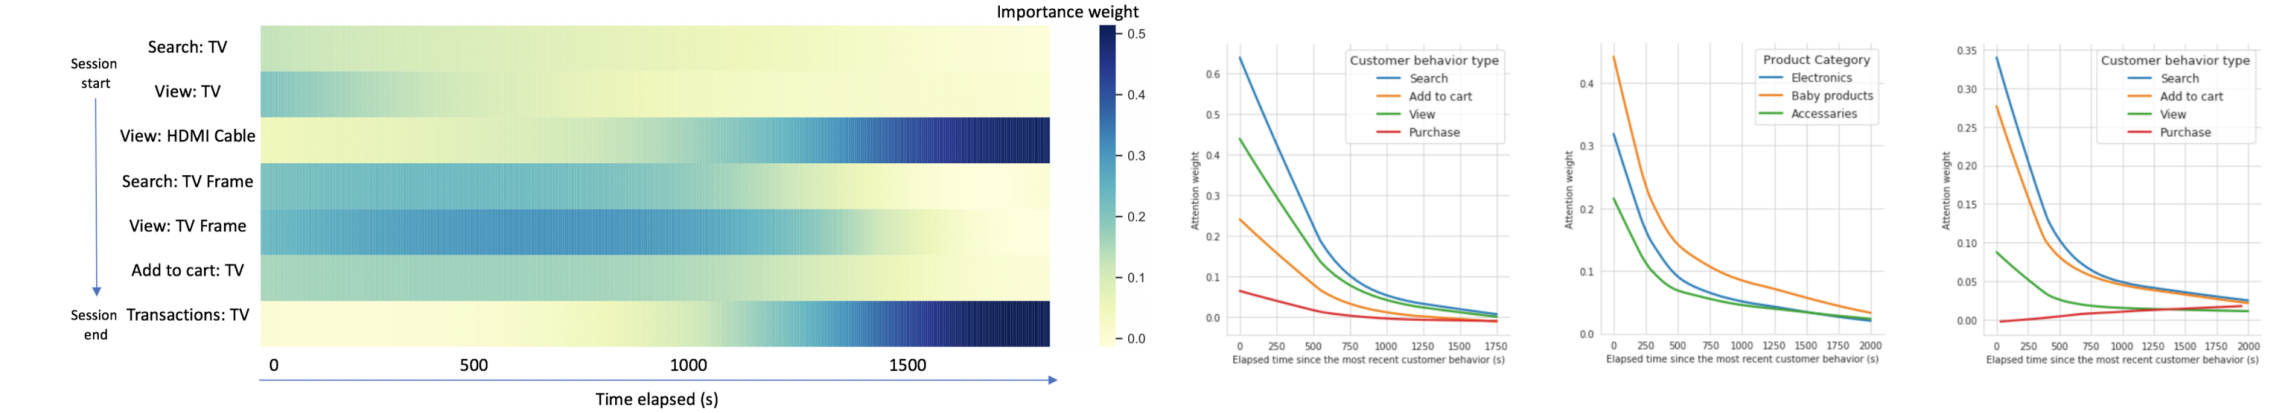

Fig. 3: Attention weight analysis as functions of time and event.

| Stack Overflow   |            |            |            |            |                |                 |                  |
|------------------|------------|------------|------------|------------|----------------|-----------------|------------------|
| Method           | LSTM       | TimeJoint  | RMTTP      | PosEnc     | Bochner Normal | Bochner Inv CDF | Bochner Non-para |
| Accuracy         | 46.03(.21) | 46.30(.23) | 46.23(.24) | 44.03(.33) | 44.89(.46)     | 44.67(.38)      | 46.27(0.29)      |
| config           |            |            |            |            | NVP            |                 | $k = 10$         |
| MovieLens-1m     |            |            |            |            |                |                 |                  |
| Method           | GRU4Rec    | Caser      | TransRec   |            |                |                 |                  |
| Hit@10           | 75.01(.25) | 78.86(.22) | 64.15(.27) | 82.45(.31) | 81.60(.69)     | 82.52(.36)      | 82.86(.22)       |
| NDCG@10          | 55.13(.14) | 55.38(.15) | 39.72(.16) | 59.05(.14) | 59.47(.56)     | 60.80(.47)      | 60.83(.15)       |
| config           |            |            |            |            | MAF            |                 | $k = 5$          |
| Walmart.com data |            |            |            |            |                |                 |                  |
| Method           | GRU4Rec    | RNN+attn   | TransRec   |            |                |                 |                  |
| Hit@5            | 4.12(.19)  | 5.90(.17)  | 7.03(.15)  | 8.63(.16)  | 4.27(.91)      | 9.04(.31)       | 9.25(.15)        |
| NDCG@5           | 4.03(.20)  | 4.66(.17)  | 5.62(.17)  | 6.92(.14)  | 4.06(.94)      | 7.27(.26)       | 7.34(.12)        |
| Hit@10           | 6.71(.50)  | 9.03(.44)  | 10.38(.41) | 12.49(.38) | 7.66(.92)      | 12.77(.65)      | 13.16(.41)       |
| NDCG@10          | 4.97(.31)  | 7.36(.26)  | 8.72(.26)  | 10.84(.26) | 6.02(.99)      | 10.95(.74)      | 11.36(.27)       |
| config           |            |            |            |            | MAF            |                 | $k = 25$         |

Fig. 4: Performance metrics for the proposed approach and baseline models. *MAF* and *NVP* are the flow-based distribution learning methods, and  $k$  gives the dimension of Fourier basis expansions.

- Lynn H Loomis. *Introduction to abstract harmonic analysis*. Courier Corporation, 2013.
- James Mercer. "Xvi. functions of positive and negative type, and their connection the theory of integral equations". In: *Philosophical transactions of the royal society of London. Series A, containing papers of a mathematical or physical character* 209.441-458 (1909), pp. 415–446.
- Ali Rahimi and Benjamin Recht. "Random features for large-scale kernel machines". In: *Advances in neural information processing systems*. 2008, pp. 1177–1184.
- Ashish Vaswani et al. "Attention is all you need". In: *Advances in neural information processing systems*. 2017, pp. 5998–6008.
